# Supplementary material for: Impact of pinworm infection on the development of murine B-cell leukemia/lymphoma in the presence and absence of ETV6::RUNX1
Source: PubMed Central journal article supplement — Haematologica. 2023 Jun 22;108(12):3480–4. doi: 10.3324/haematol.2022.282591 (PMC10690896; doi:10.3324/haematol.2022.282591), 2023-06-22
Supplement: 2022_282591_FITCH_SUPPL.pdf [file 2022_282591_FITCH_SUPPL.pdf]

# Impact of pinworm infection on the development of murine B-cell leukemia/lymphoma in the presence and absence of *ETV6::RUNX1*

Briana A. Fitch,<sup>1</sup> Jamilla Situ,<sup>2</sup> Joseph L. Wiemels,<sup>3</sup> Scott C. Kogan<sup>2,4</sup> and Mi Zhou<sup>2</sup>

<sup>1</sup>Department of Pathology, Keck School of Medicine, University of Southern California, Los Angeles; <sup>2</sup>Department of Laboratory Medicine, University of California San Francisco, San Francisco; <sup>3</sup>Center for Genetic Epidemiology, Department of Population and Public Health Sciences, University of Southern California, Keck School of Medicine, Los Angeles and <sup>4</sup>Helen Diller Family Comprehensive Cancer Center, University of California San Francisco, San Francisco, CA, USA

Correspondence:

MI ZHOU - mi.zhou@ucsf.edu

<https://doi.org/10.3324/haematol.2022.282591>

**Supplemental Table 1. Disease outcomes of *Cdkn2a*<sup>-/-</sup> and *E6R1*<sup>+</sup> *Cdkn2a*<sup>-/-</sup> mice housed in SPF or pinworm-infected facilities.**

|                          | SPF <i>E6R1</i> <sup>+</sup> <i>Cdkn2a</i> <sup>-/-</sup><br>(N=55) | Pinworm <i>E6R1</i> <sup>+</sup> <i>Cdkn2a</i> <sup>-/-</sup><br>(N=44) | SPF <i>Cdkn2a</i> <sup>-/-</sup><br>(N=76) | Pinworm <i>Cdkn2a</i> <sup>-/-</sup><br>(N=54) |
|--------------------------|---------------------------------------------------------------------|-------------------------------------------------------------------------|--------------------------------------------|------------------------------------------------|
|                          | N (% total)                                                         |                                                                         |                                            |                                                |
| <b>Cancer</b>            | 42 (76%)                                                            | 41 (93%)                                                                | 56 (74%)                                   | 44 (81%)                                       |
| <b>Leukemia/Lymphoma</b> | 28 (51%)                                                            | 23 (52%)                                                                | 23 (30%)                                   | 14 (26%)                                       |

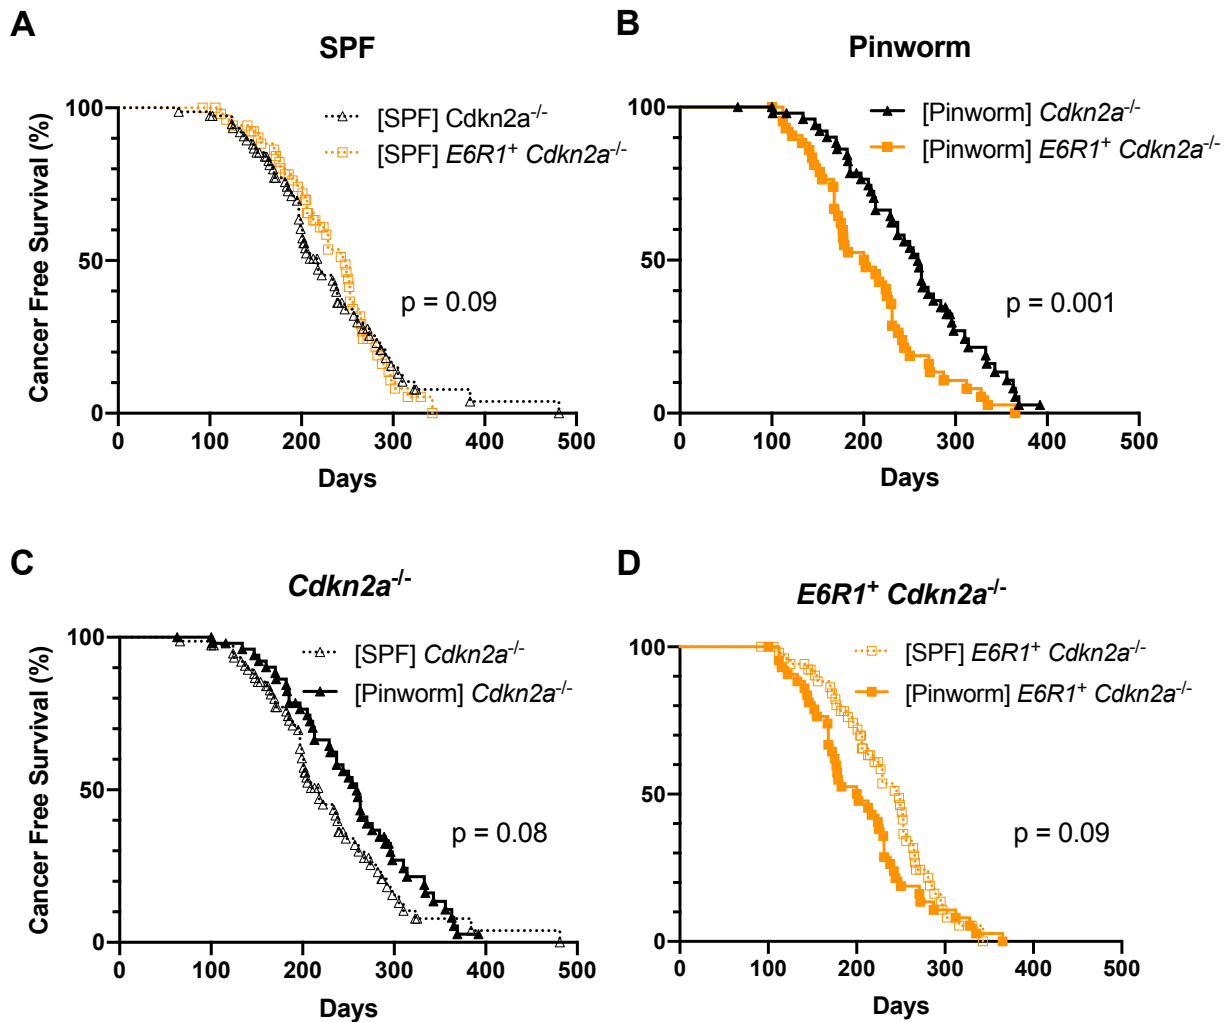

**Supplemental Figure 1.** Pinworm exposure is associated with increased latency of cancer development in the absence of *E6R1* and is associated with decreased latency of cancer development in the presence of *E6R1*. Cumulative survival curves showing combined data from Figure 1 of four independent experiments of mice housed in a pinworm-free SPF facility or pinworm-infected facility. Cancer-free survival for (A) SPF-housed (open symbols) and (B) pinworm-exposed (filled symbols) *Cdkn2a*<sup>-/-</sup> mice (black triangles) and *E6R1*<sup>+</sup> *Cdkn2a*<sup>-/-</sup> mice (orange squares). Cancer-free survival for genotype matched (C) *Cdkn2a*<sup>-/-</sup> mice and (D) *E6R1*<sup>+</sup> *Cdkn2a*<sup>-/-</sup> mice. SPF *Cdkn2a*<sup>-/-</sup> mice (n=76), SPF *E6R1*<sup>+</sup> *Cdkn2a*<sup>-/-</sup> mice (n=55), pinworm-exposed *Cdkn2a*<sup>-/-</sup> mice (n=54), and pinworm-exposed *E6R1*<sup>+</sup> *Cdkn2a*<sup>-/-</sup> mice (n=44). Log-rank (Mantel-Cox) test was applied to survival curves.

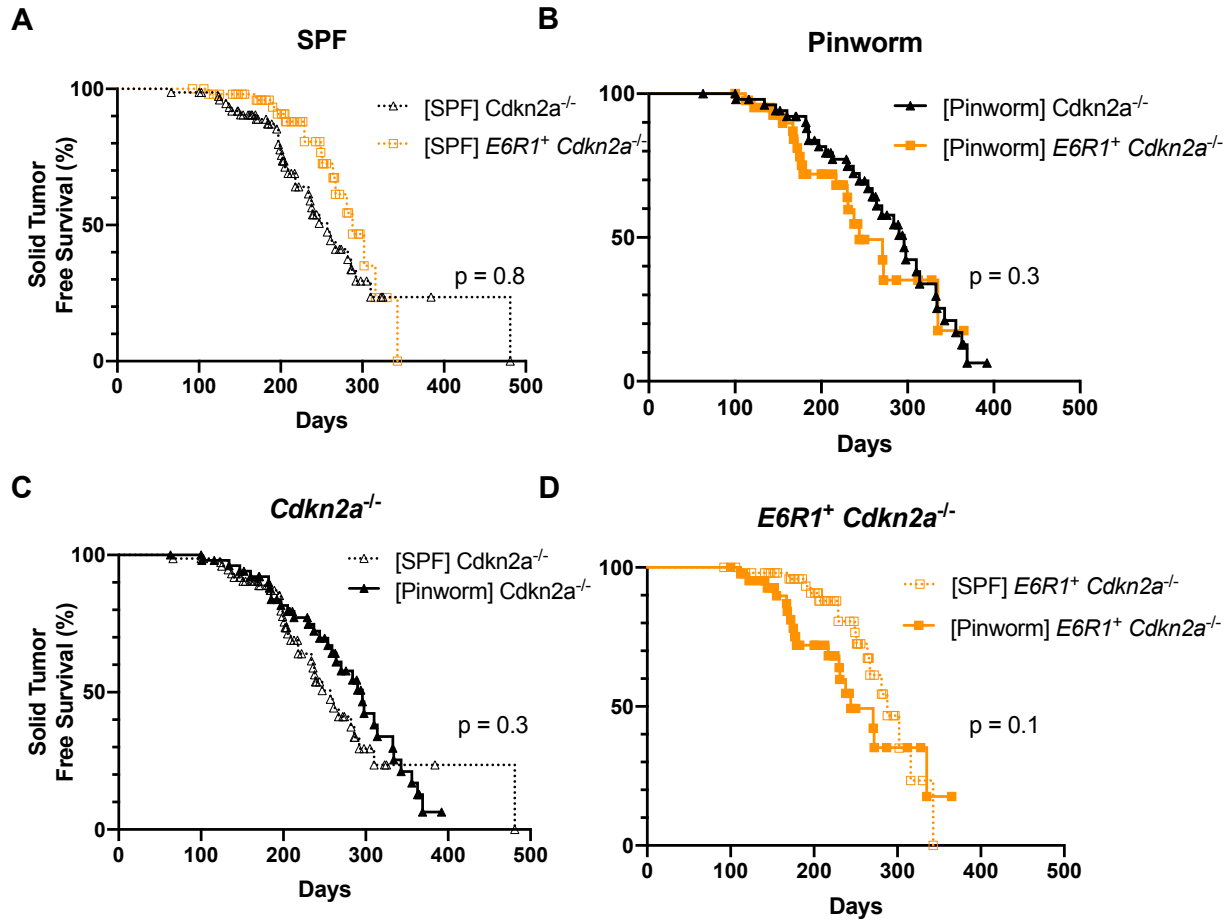

**Supplemental Figure 2.** Impact of pinworm exposure on solid tumor development in the absence and presence of *E6R1*. Cumulative survival curves showing combined data from Figure 1 of four independent experiments of mice housed in a pinworm-free SPF facility or pinworm-infected conventional facility. Solid tumor-free survival for **(A)** SPF-housed (open symbols) and **(B)** pinworm-exposed (filled symbols)  $Cdkn2a^{-/-}$  mice (black triangles) and  $E6R1^{+} Cdkn2a^{-/-}$  mice (orange squares). Solid tumor-free survival for genotype matched **(C)**  $Cdkn2a^{-/-}$  mice and **(D)**  $E6R1^{+} Cdkn2a^{-/-}$  mice. SPF  $Cdkn2a^{-/-}$  mice (n=76), SPF  $E6R1^{+} Cdkn2a^{-/-}$  mice (n=55), pinworm-exposed  $Cdkn2a^{-/-}$  mice (n=54), and pinworm-exposed  $E6R1^{+} Cdkn2a^{-/-}$  mice (n=44). Log-rank (Mantel-Cox) test was applied to survival curves.
